# Supplementary material for: Profiling of Tumour-Infiltrating Lymphocytes and Tumour-Associated Macrophages in Ovarian Epithelial Cancer—Relation to Tumour Characteristics and Impact on Prognosis
Source: MDPI journal article supplement (doi:10.3390/ijms25084524), 2024-04-20
Supplement: s1 [file s1]

Supplementary Table S1. Crude infiltration percentage per HPF according to histological subtype for CD3, CD20, CD68.

|        |       |     |        | 95% Confidence Interval for Mean |             |
|--------|-------|-----|--------|----------------------------------|-------------|
| N      |       |     | Mean   | Lower Bound                      | Upper Bound |
| CD3 %  | 1     | 15  | 11.333 | 3.427                            | 19.239      |
|        | 2     | 18  | 10.028 | 1.698                            | 18.358      |
|        | 3     | 6   | 11.250 | -.687                            | 23.187      |
|        | 4     | 12  | 11.375 | 4.405                            | 18.345      |
|        | 5     | 6   | 5.000  | -2.881                           | 12.881      |
|        | 6     | 79  | 14.918 | 11.225                           | 18.610      |
|        | 7     | 2   | 6.750  | -66.311                          | 79.811      |
|        | Total | 138 | 12.873 | 10.295                           | 15.451      |
| CD20 % | 1     | 15  | 1.733  | .174                             | 3.292       |
|        | 2     | 18  | .833   | .047                             | 1.620       |
|        | 3     | 6   | 2.167  | -1.893                           | 6.227       |
|        | 4     | 12  | .417   | -.500                            | 1.334       |
|        | 5     | 6   | .000   | .000                             | .000        |
|        | 6     | 79  | 1.481  | .782                             | 2.180       |
|        | 7     | 2   | 3.000  | -22.412                          | 28.412      |
|        | Total | 138 | 1.319  | .851                             | 1.787       |
| CD68%  | 1     | 15  | 35.667 | 23.423                           | 47.910      |
|        | 2     | 18  | 31.944 | 20.498                           | 43.391      |
|        | 3     | 6   | 29.583 | 2.602                            | 56.565      |
|        | 4     | 12  | 41.250 | 29.906                           | 52.594      |
|        | 5     | 6   | 21.667 | 1.299                            | 42.034      |
|        | 6     | 79  | 37.975 | 33.062                           | 42.888      |
|        | 7     | 2   | 27.500 | -67.797                          | 122.797     |
|        | Total | 138 | 35.996 | 32.337                           | 39.656      |

Supplementary Table S2. ANOVA: One way analysis of variables effect size - infiltration percentage per HPF according to histological subtype for CD3, CD20, CD68.

|        |                            | Point Estimate | 95% Confidence Interval |       |
|--------|----------------------------|----------------|-------------------------|-------|
|        |                            |                | Lower                   | Upper |
| CD3 %  | Eta-squared                | 0.031          | 0.000                   | 0.061 |
|        | Omega-squared Fixed-effect | -0.013         | -0.045                  | 0.018 |
| CD20 % | Eta-squared                | 0.037          | 0.000                   | 0.073 |
|        | Omega-squared Fixed-effect | -0.007         | -0.045                  | 0.030 |
| CD68%  | Eta-squared                | 0.040          | 0.000                   | 0.077 |
|        | Omega-squared Fixed-effect | -0.004         | -0.045                  | 0.035 |

Eta-squared estimated based on the fixed-effect model.  
Negative but less biased estimates are retained, not rounded to zero.
